# Supplementary material
Source: publisher figshare collection journal article supplement (https://future-science-group.figshare.com/ndownloader/files/28656981)
Supplement: Supplementary file 1 [file 28656981]

Supplementary Table 1. The constructed prediction equations from the multiple regression analyses.

| Outcome measure | Prediction formula |
| --- | --- |
| Operation time (hours) | 1/(ABS(0.094-0.010*stapler type-0.010*male-0.008*(18.5<=BMI<24)-0.013*(28<=BMI<30)-0.004*residence (regional city)-0.011*COPD-0.004*Digestive system diseases-0.012*Endocrine system diseases -0.007*squamous cell carcinoma-0.003*Tumor stage I-0.010*Abnormal platelet count-0.003*operation site at upper left lung）^0.5) |
| Post-surgery length of stay (days) | 1/(ABS(0.020-0.003*Stapler type-0.002*(18.5<=BMI<24)-0.003*Emphysema-0.001*diabetes-0.001*Cerebrovascular/cerebral nerve disease-0.001*Urinary system diseases-0.001*Digestive system diseases-0.001*Reproductive system diseases-0.002*Endocrine system diseases+0.000*Tumor stage I-0.004*Abnormal platelet count-0.001*Operation site at upper left lung）^0.5) |
| Extended drainage tube placement duration | EXP(-3.109-0.050*stapler type+0.640*male+1.149*pulmonary nodules+1.170*COPD+0.782*bronchial diseases+0.410*digestive system diseases+0.919*endocrine system diseases+0.766*abnormal erythrocyte count+1.335*abnormal platelet count)/(1+exp(-3.109-0.050*stapler type+0.640*male+1.149*pulmonary nodules+1.170*COPD+0.782*bronchial diseases+0.410*digestive system diseases+0.919*endocrine system diseases+0.766*abnormal erythrocyte count+1.335*abnormal platelet count)) |
| Intraoperative blood transfusion rate | 37.370-61.683*Stapler type+94.197*Urban residence insurance plan+688.954*Lung infection+391.843*ENT diseases+57.483*Squamous cell carcinoma |
| Total blood transfusion volume（ml） | EXP(LN(0.007)+LN(0.629)*Stapler type+LN(4.059)*(24<=BMI<28)+LN(2.969)*Hypertension+LN(1.138)*Coronary heart disease+LN(5.433)*vascular diseases+LN(28.512)*Carcinoid+LN(0.835)*Tumor stage I+LN(1.136)*Abnormal red blood cell count+LN(7.011)*abnormal hemoglobin+LN(5.380)*abnormal platelet count+LN(1.022)*Operation site at upper left lung)/(1+EXP(LN(0.007)+LN(0.629)*Stapler type+LN(4.059)*(24<=BMI<28)+LN(2.969)*hypertension+LN(1.138)*coronary heart disease+LN(5.433)*vascular diseases+LN(28.512)*Carcinoid+LN(0.835)*Tumor stage I+LN(1.136)*Abnormal red blood cell count+LN(7.011)*abnormal hemoglobin+LN(5.380)*abnormal platelet count+LN(1.022)*Operation site at upper left lung)) |
| Post-surgery air leak rate | EXP(LN(0.320)+LN(0.800)*Stapler type+LN(1.422)*male+LN(1.020)*age+LN(0.515)*(24<=BMI<28)+LN(1.962)*Bronchial disease+LN(1.013)*Tumor stage I+LN(1.756)*Abnormal red blood cell count+LN(0.366)*abnormal white blood cell count+LN(0.537)*operation classification IV+LN(0.662)*operation site at upper left lung)/(1+EXP(LN(0.320)+LN(0.800)*Stapler type+LN(1.422)*male+LN(1.020)*age+LN(0.515)*(24<=BMI<28)+LN(1.962)*Bronchial disease+LN(1.013)*Tumor stage I+LN(1.756)*Abnormal red blood cell count+LN(0.366)*abnormal white blood cell count+LN(0.537)*operation classification IV+LN(0.662)*operation site at upper left lung)) |
| Utilized number of staplers | EXP(0.197-0.049*Stapler type+0.072*Tumor stage I+0.066*Operation site at upper left lung) |
| Utilized number of cartridges | EXP(1.815+0.005*Stapler type+0.131*male-0.058*(18.5<=BMI<24)-0.037*residence in capital city+0.143*residence out of Hunan+0.068*Other insurance plan+0.134*Bullae-0.221*COPD+0.181*Thoracic mediastinal disease-0.164*Cerebrovascular/Cerebral nerve disease-0.175*Sport system diseases-0.252*Vascular diseases-0.821*Tuberculosis/granulomatosis+0.168*Tumor stage I+0.071*Abnormal white blood cell count+0.161*Abnormal platelet count-0.093*operation classification IV+0.017*operation site at upper left lung) |
